# Supplementary material for: Cannabidiol improves muscular lipid profile by affecting the expression of fatty acid transporters and inhibiting de novo lipogenesis
Source: Springer Nature journal article supplement (doi:10.1038/s41598-023-30872-w), 2023-03-06

**Loading order in all Western blots: Control, HFD, CBD, HFD+CBD.**

**On the left are stain-free gels showing the total protein loading used for normalization.**

**On the right are corresponding membranes with the detected proteins.**

### White skeletal muscle

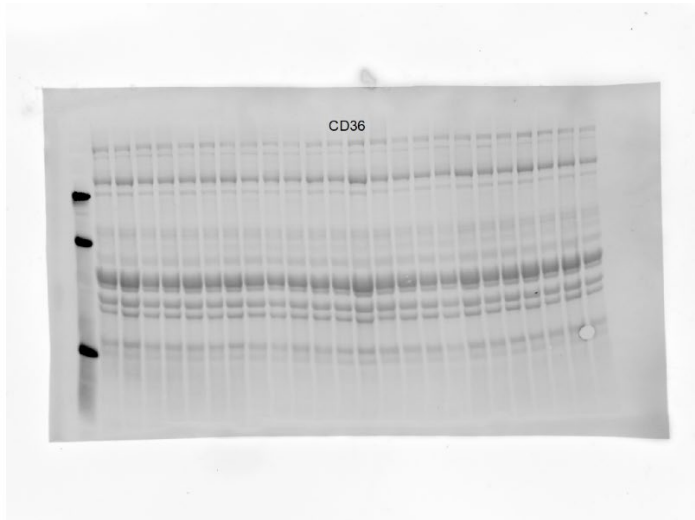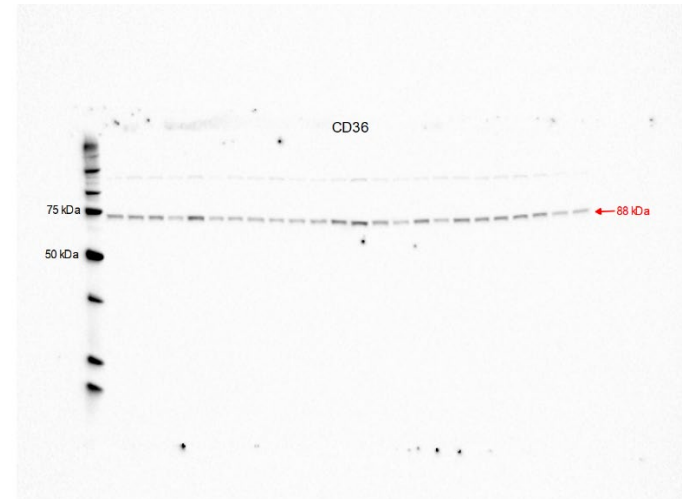

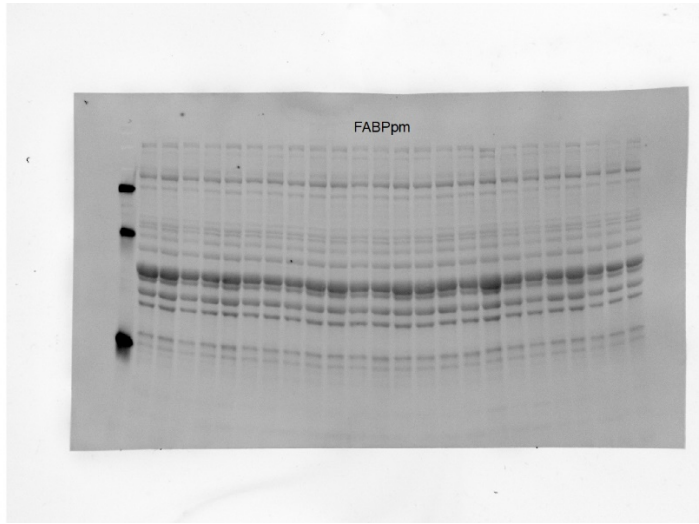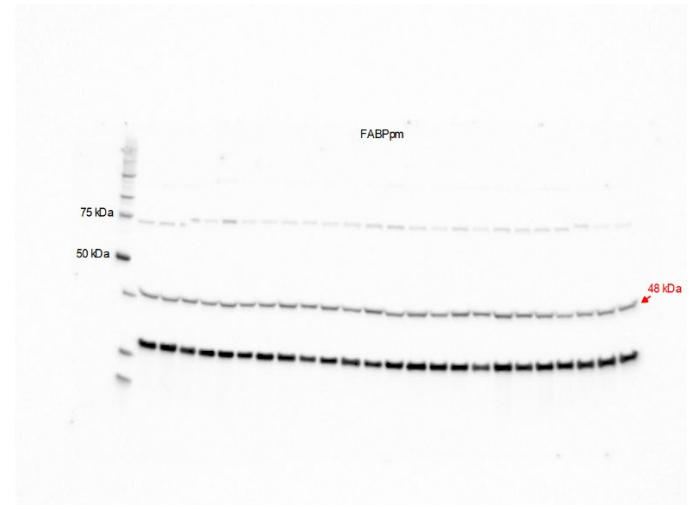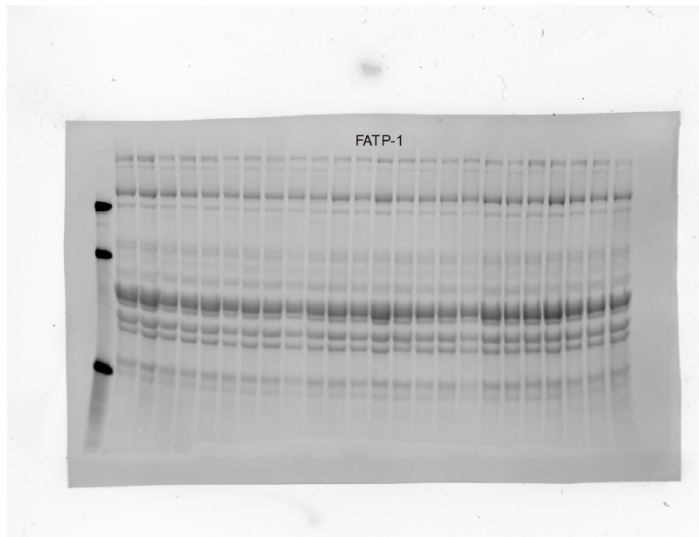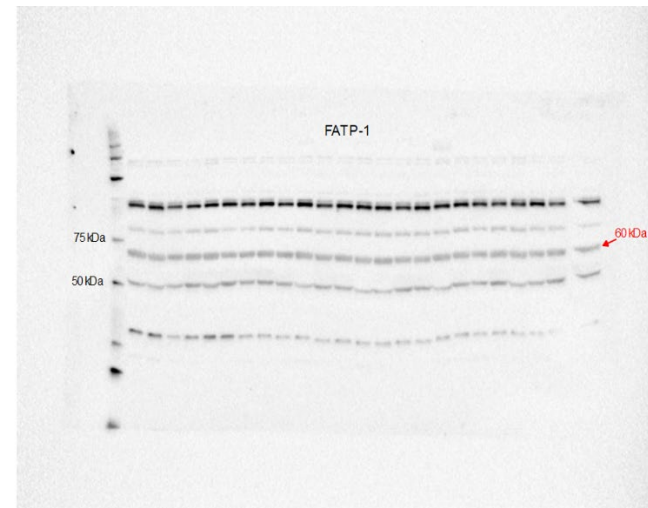

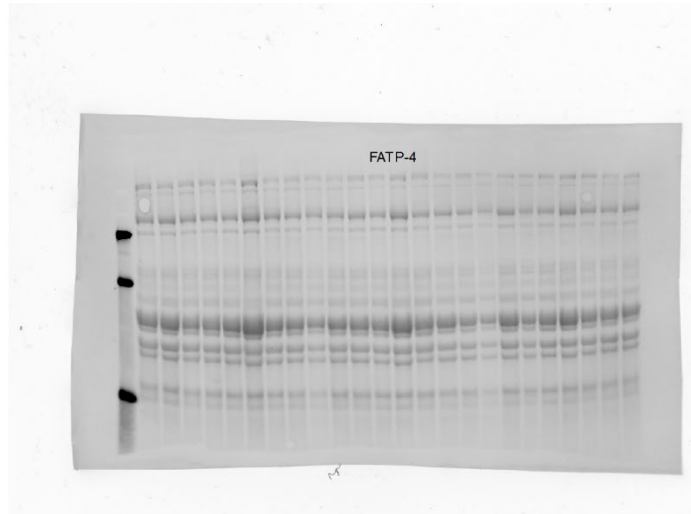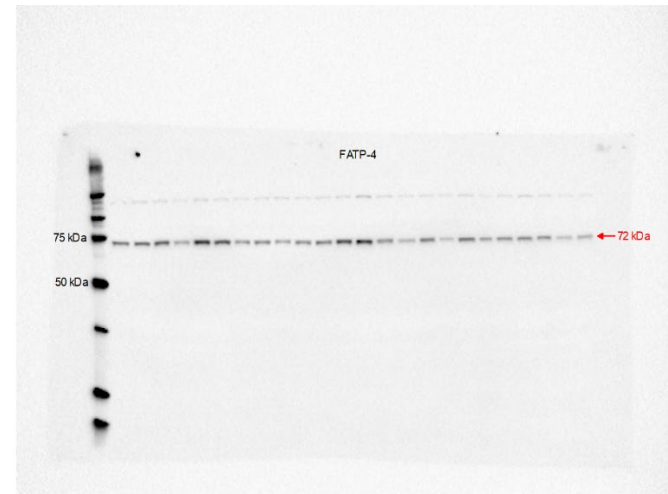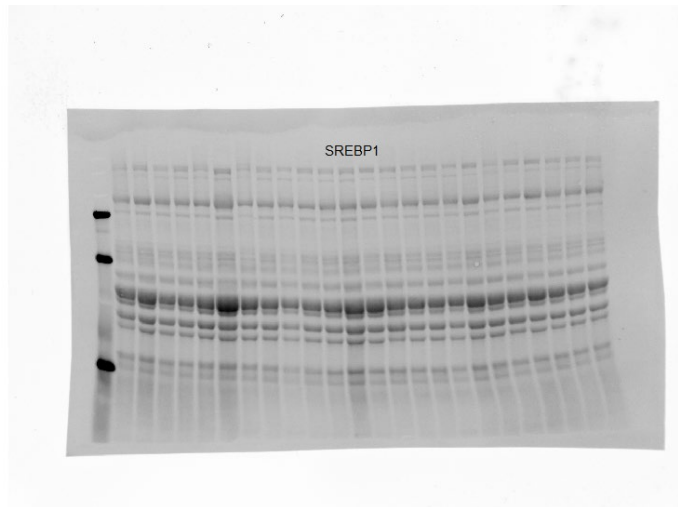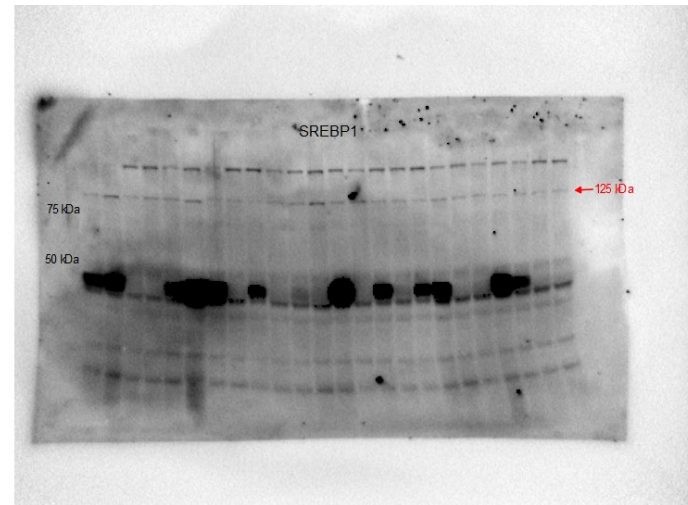

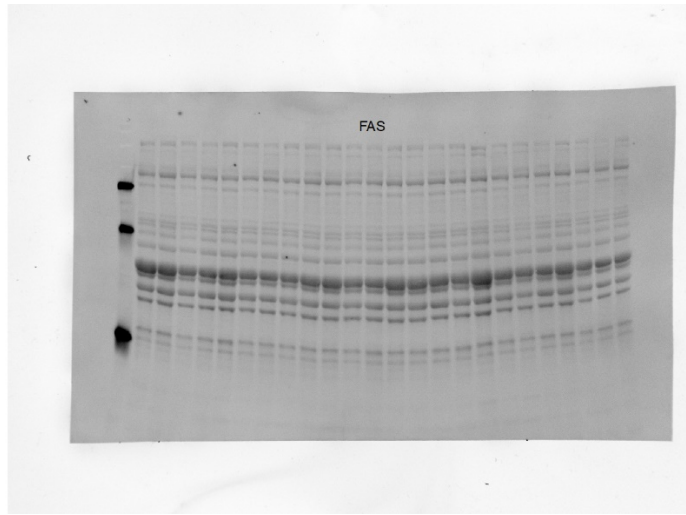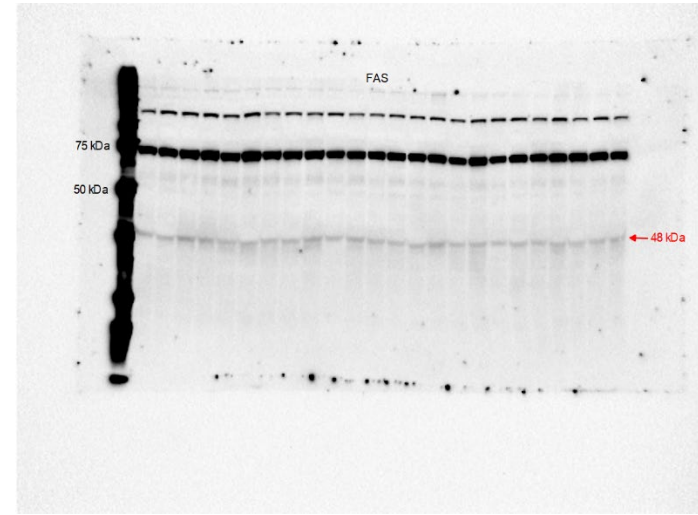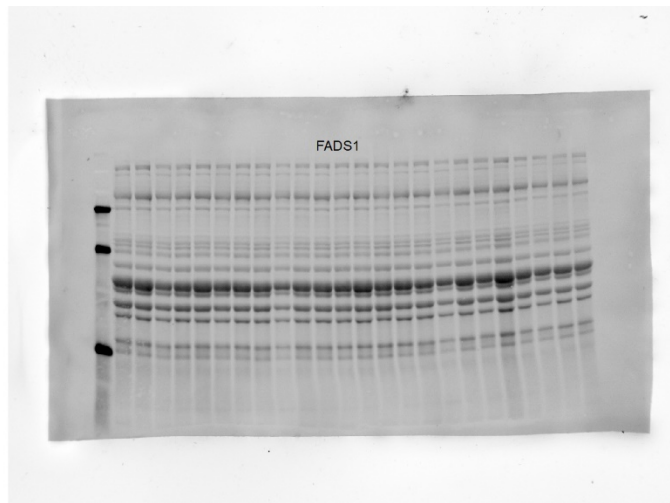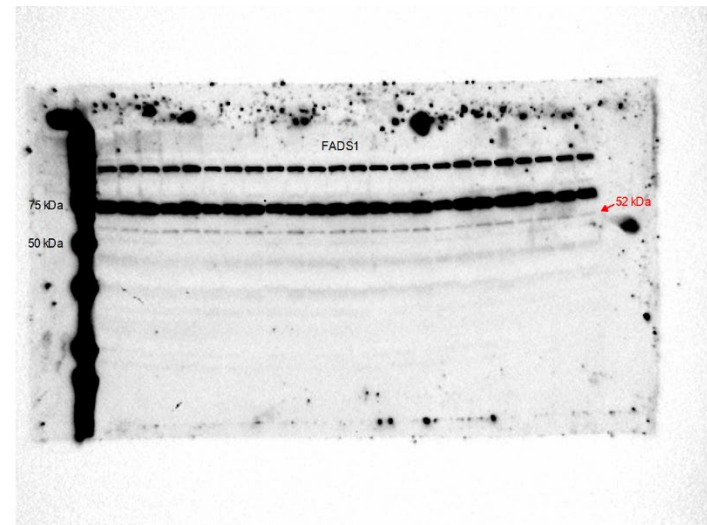

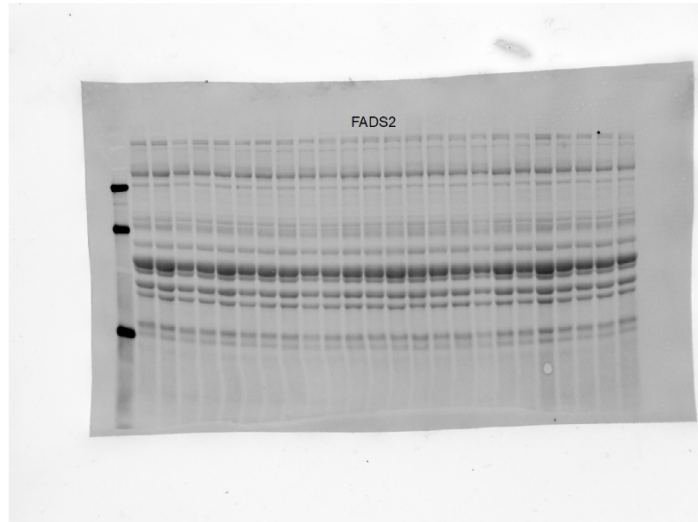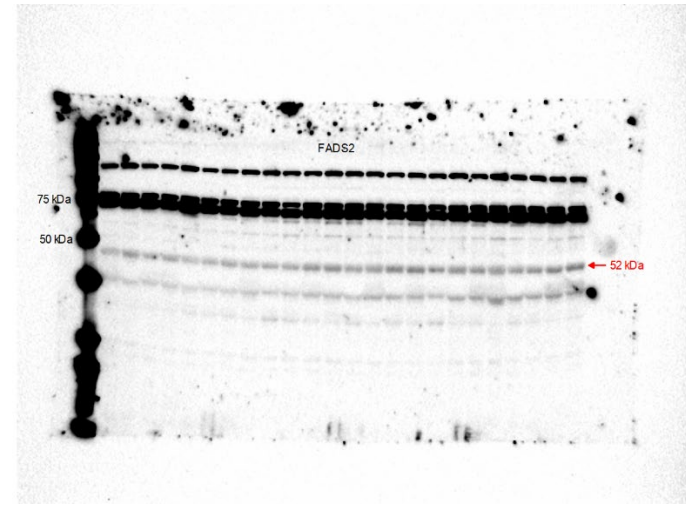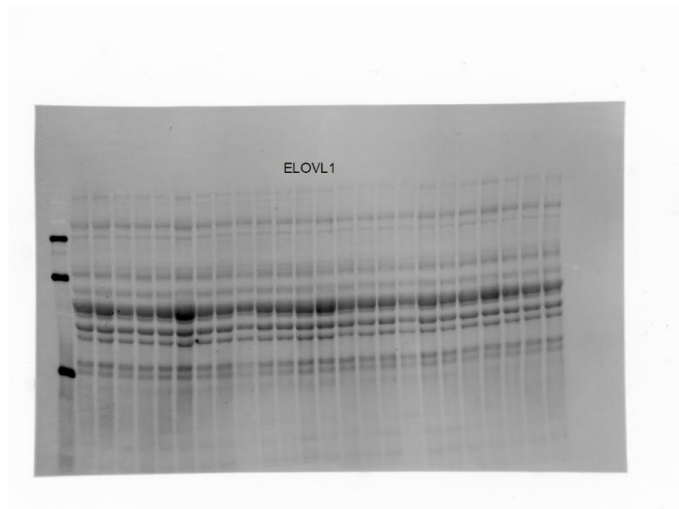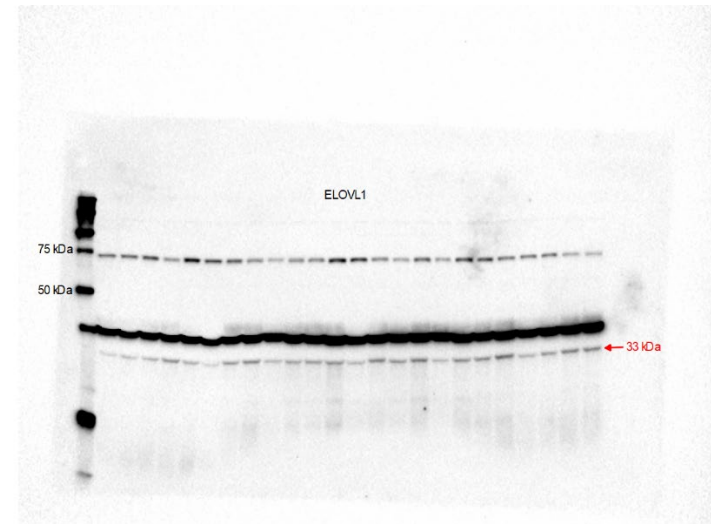

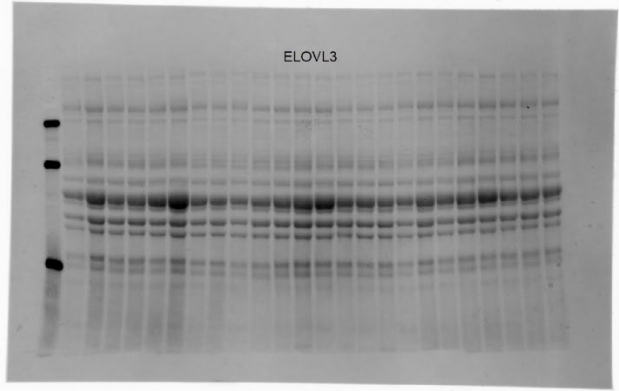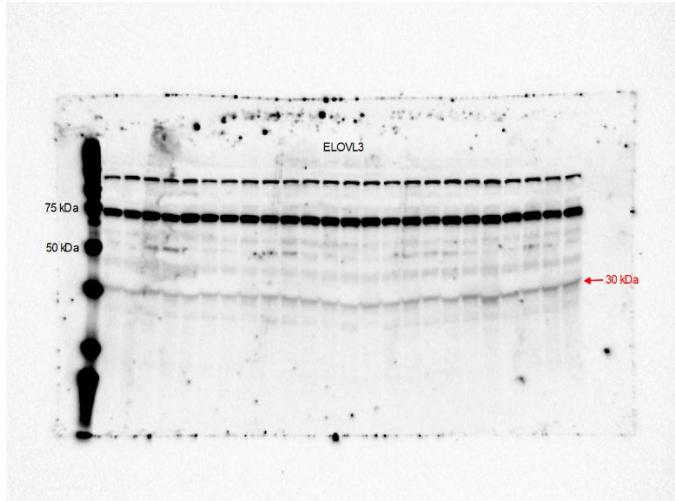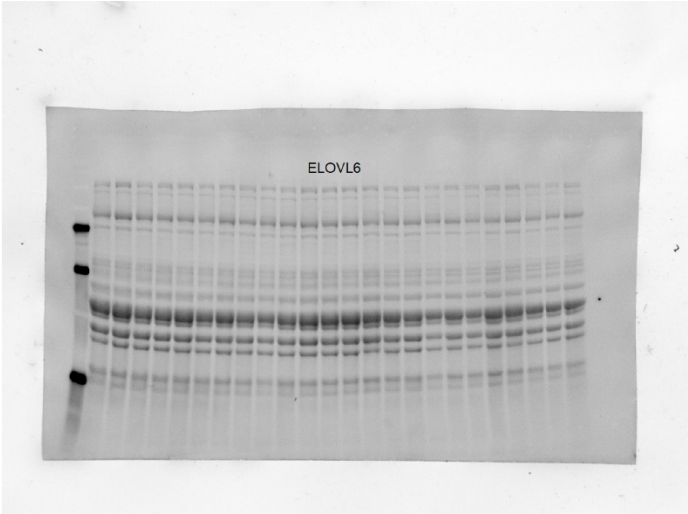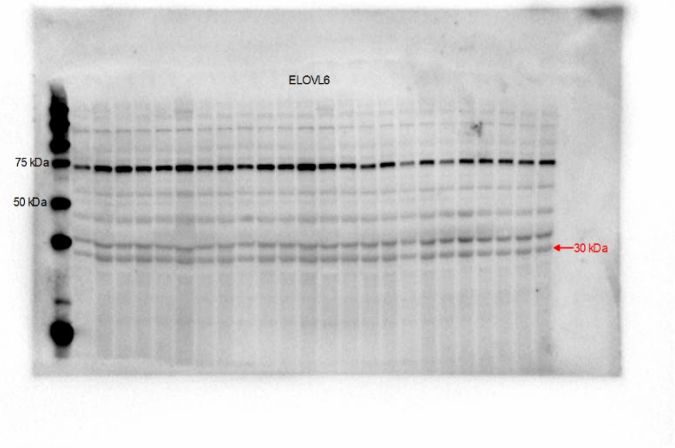

## Red skeletal muscle

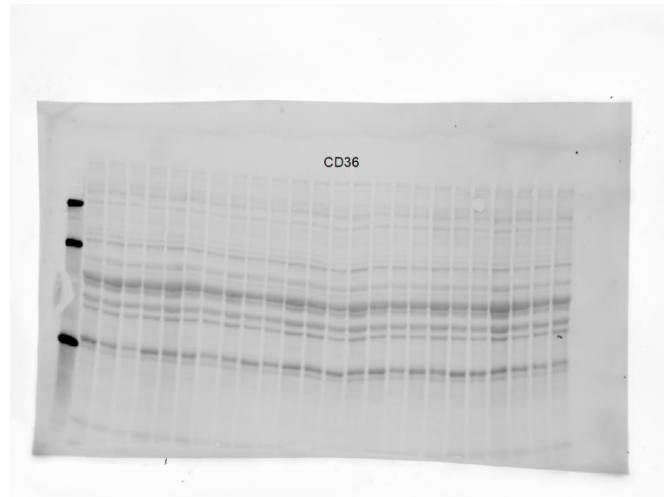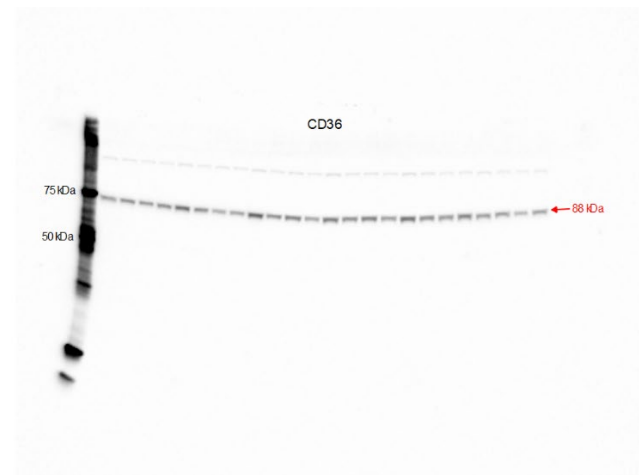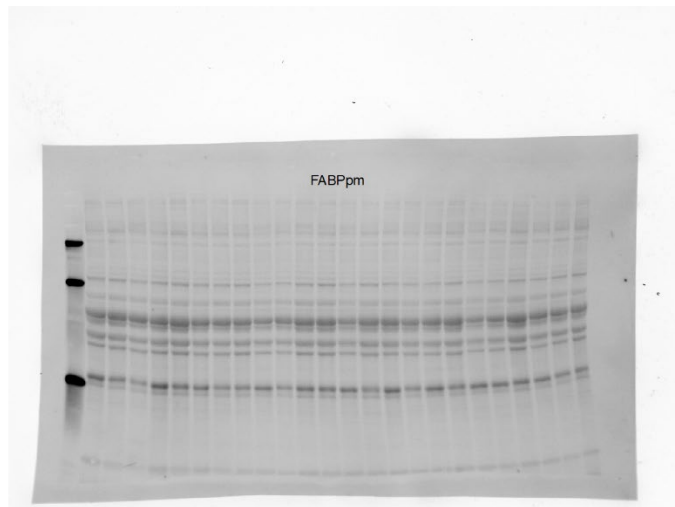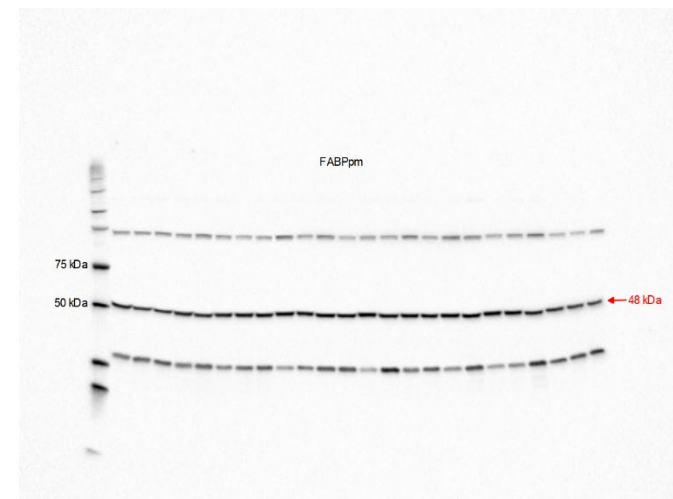

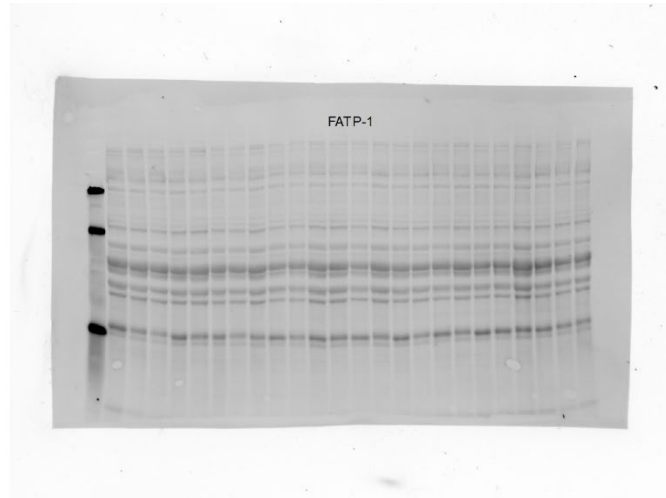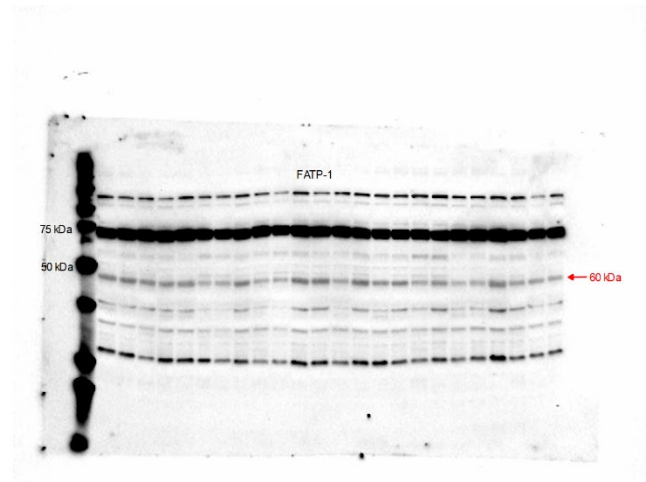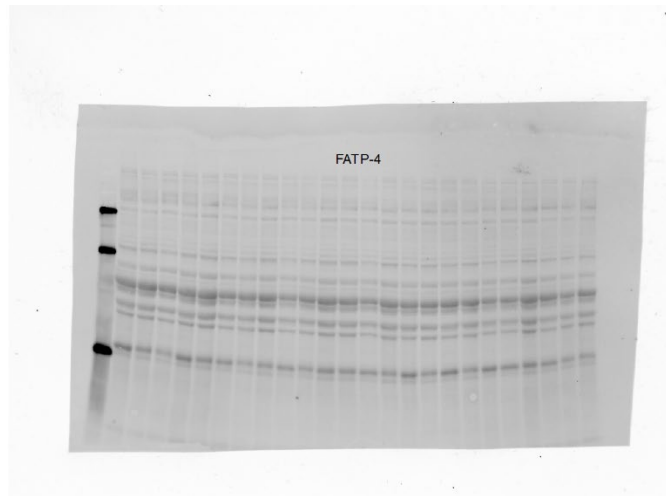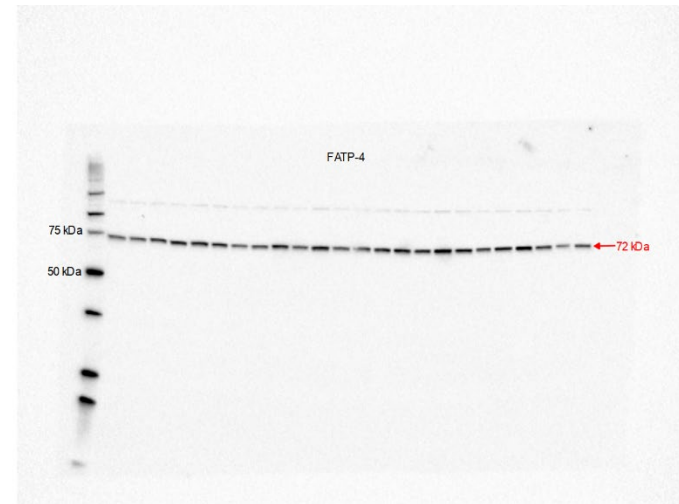

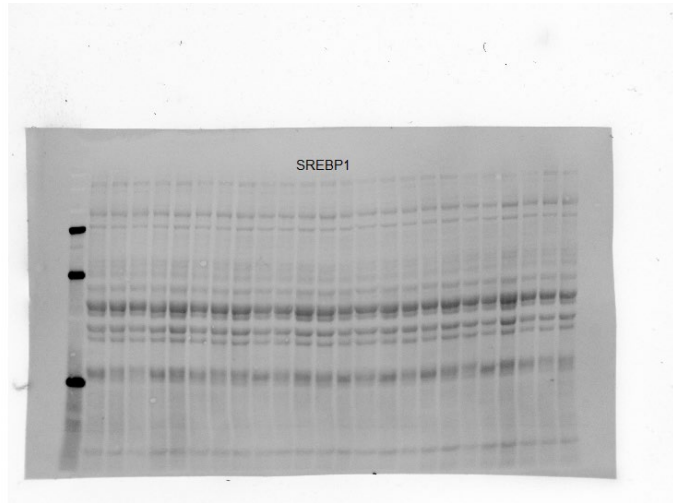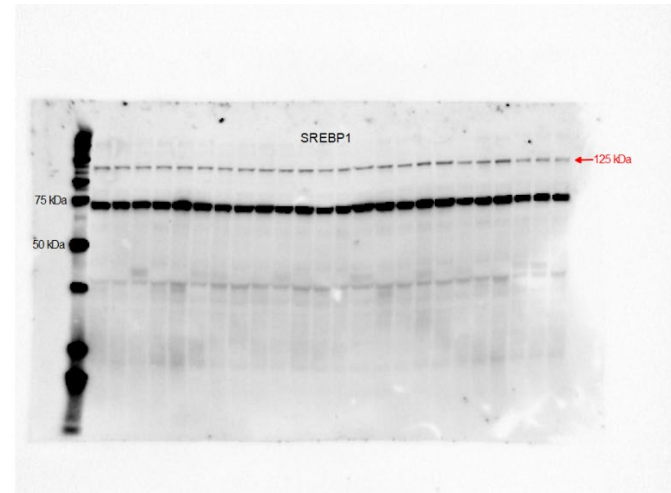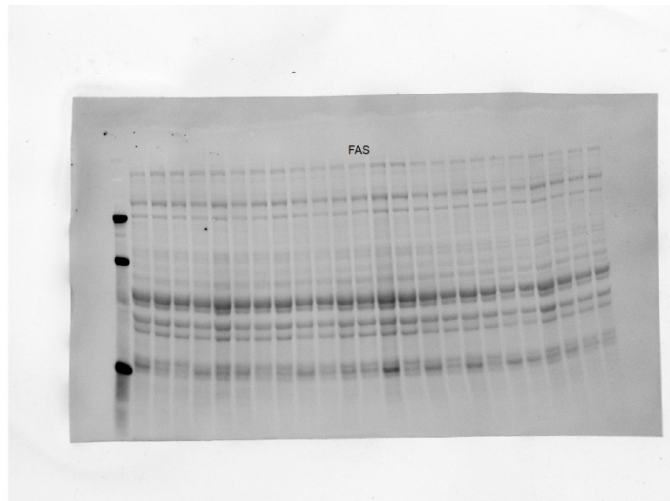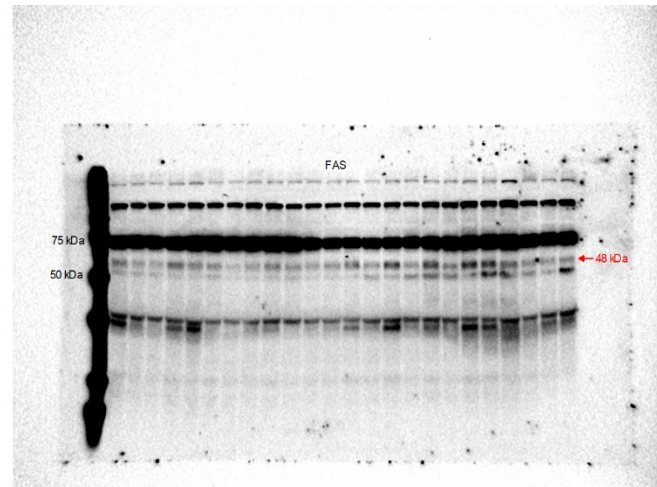

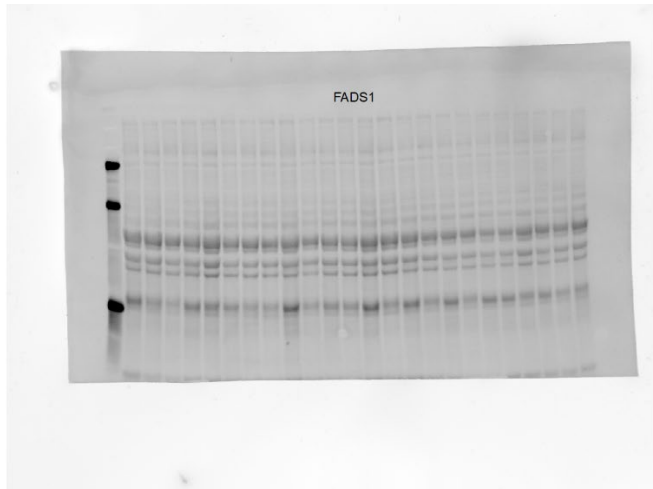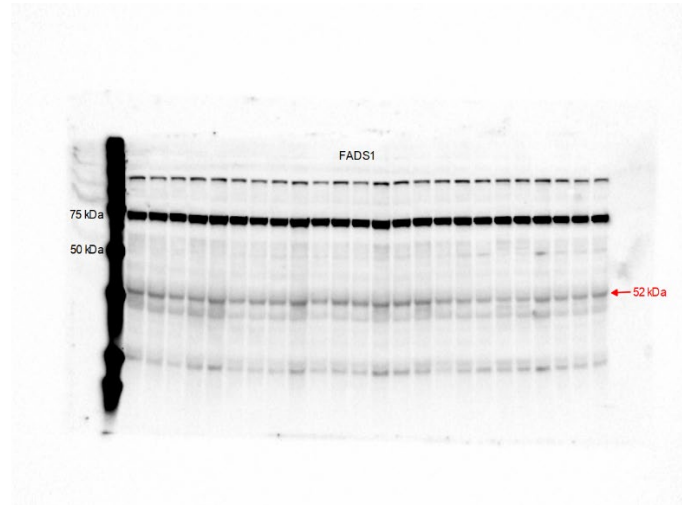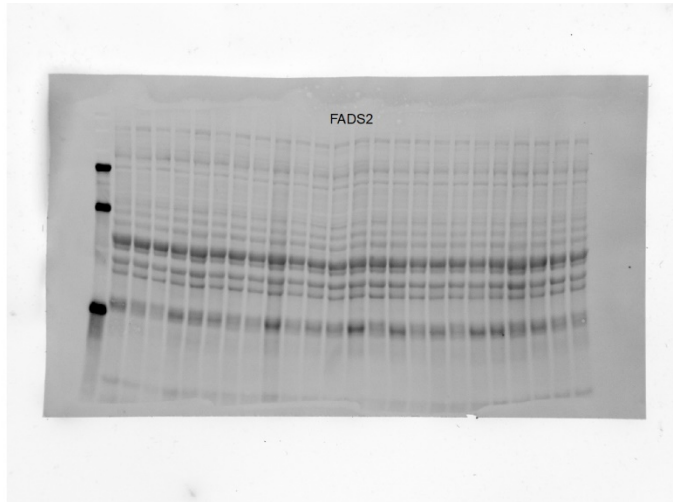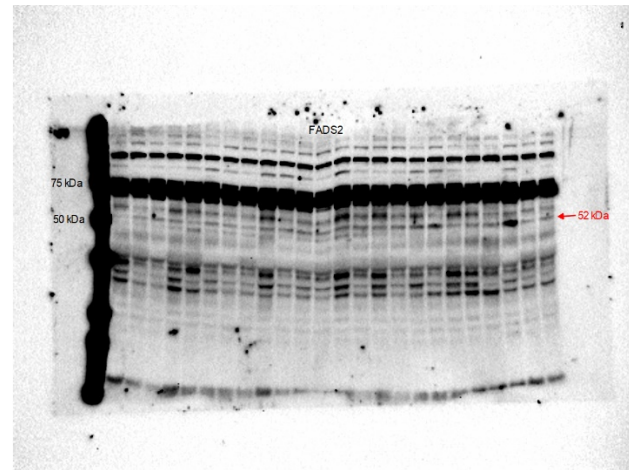

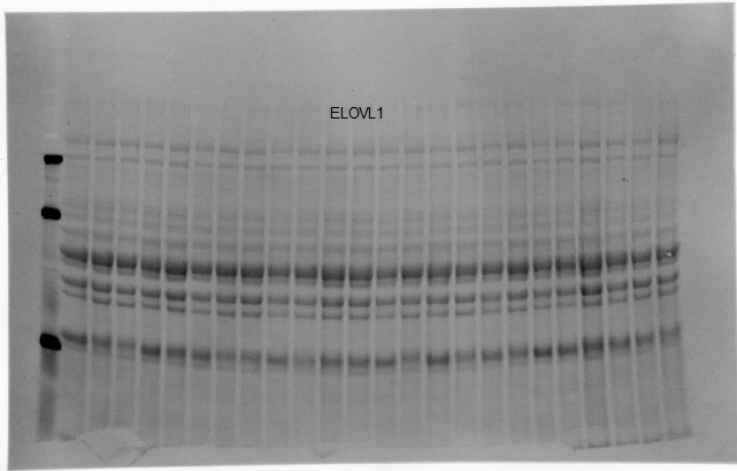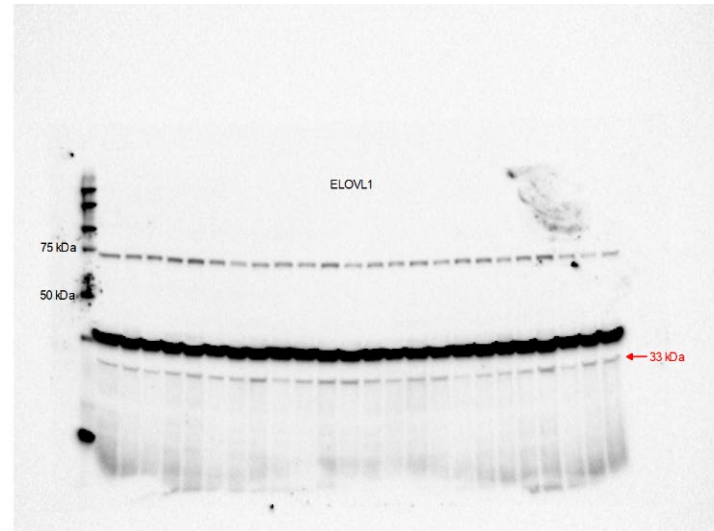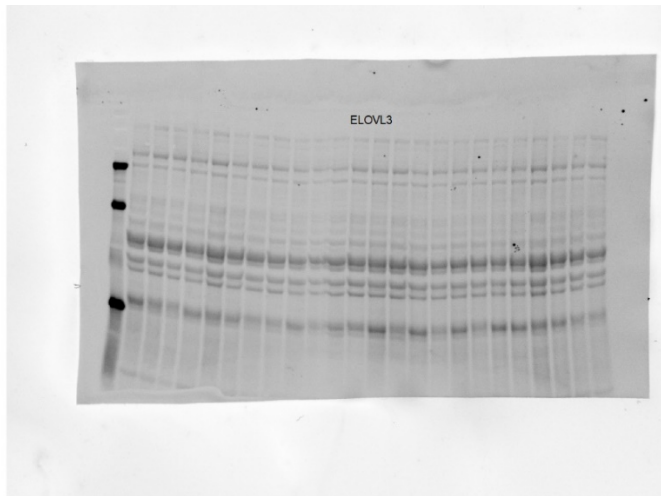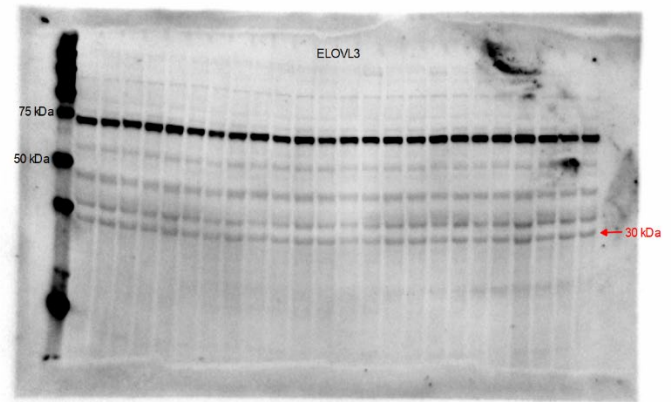

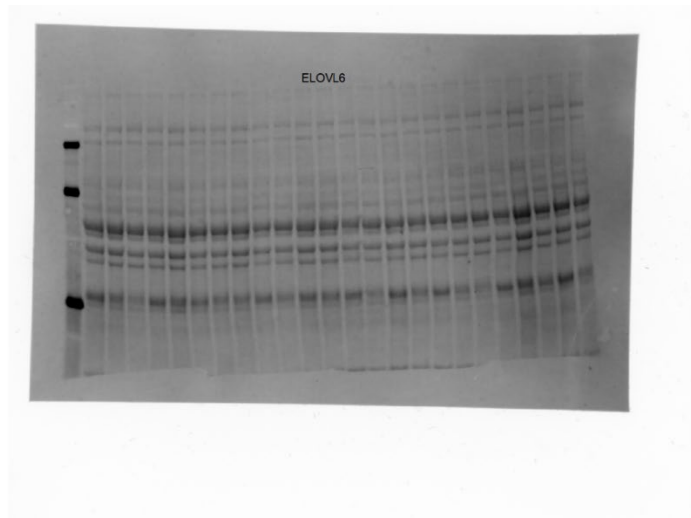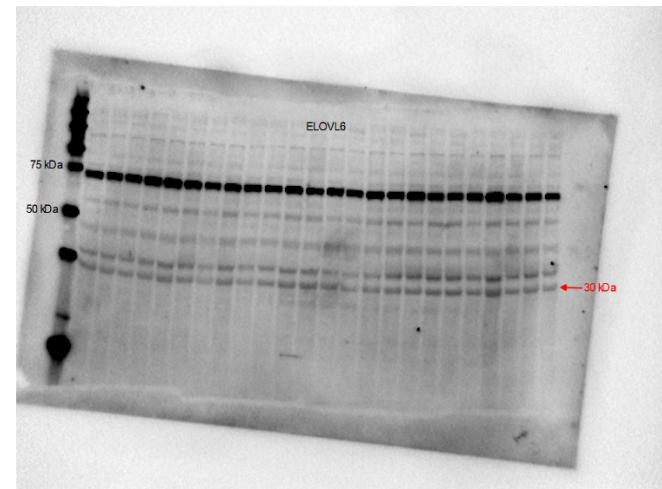

Supplement: MOESM2 [file 41598_2023_30872_MOESM2_ESM-1.pdf]
