# Supplementary material for: Cannabidiol improves muscular lipid profile by affecting the expression of fatty acid transporters and inhibiting de novo lipogenesis
Source: Springer Nature journal article supplement (doi:10.1038/s41598-023-30872-w), 2023-03-06
Supplement: MOESM1 [file 41598_2023_30872_MOESM1_ESM.pdf]

## White skeletal muscle

**Supplementary Table S1.** Individual fatty acids content in the FFA fraction (nmol/g of wet tissue) in the white gastrocnemius muscle in the control (standard diet) and high-fat diet (HFD) groups after two-week cannabidiol (CBD) treatment.

| Fatty acid    | Control        | CBD                      | HFD                        | HFD + CBD                     |
|---------------|----------------|--------------------------|----------------------------|-------------------------------|
| <b>14:0</b>   | 22.14 ± 2.87   | 21.27 ± 4.11             | 27.92 ± 7.48 <sup>a</sup>  | 20.26 ± 2.37 <sup>b</sup>     |
| <b>16:0</b>   | 159.96 ± 23.43 | 150.37 ± 33.49           | 145.74 ± 26.68             | 161.80 ± 14.35                |
| <b>16:1n7</b> | 12.10 ± 1.32   | 13.28 ± 2.77             | 9.76 ± 1.79 <sup>a</sup>   | 14.38 ± 2.41 <sup>b</sup>     |
| <b>18:0</b>   | 66.20 ± 11.97  | 62.01 ± 15.08            | 55.13 ± 8.15 <sup>a</sup>  | 71.79 ± 9.24 <sup>b</sup>     |
| <b>18:1n9</b> | 57.72 ± 10.08  | 69.67 ± 20.50            | 74.60 ± 13.50 <sup>a</sup> | 119.42 ± 10.02 <sup>a,b</sup> |
| <b>20:0</b>   | 2.40 ± 0.35    | 1.93 ± 0.39 <sup>a</sup> | 2.13 ± 0.39                | 1.93 ± 0.27 <sup>a</sup>      |
| <b>22:0</b>   | 1.94 ± 0.38    | 1.89 ± 0.43              | 1.79 ± 0.42                | 1.52 ± 0.18 <sup>a</sup>      |
| <b>24:0</b>   | 6.17 ± 1.31    | 4.20 ± 0.81 <sup>a</sup> | 4.99 ± 0.84 <sup>a</sup>   | 3.79 ± 0.90 <sup>a,b</sup>    |
| <b>24:1n9</b> | 1.38 ± 0.27    | 1.43 ± 0.25              | 1.35 ± 0.14                | 0.97 ± 0.17 <sup>a,b</sup>    |

The data are expressed as mean values ± SD, n = 10 in each group. <sup>a</sup>p < 0.05 indicates a significant difference: the control group vs. the examined group in the white gastrocnemius muscle; <sup>b</sup>p < 0.05 indicates a significant difference: HFD vs. HFD + CBD in the white gastrocnemius muscle. 14:0 (myristic acid); 16:0 (palmitic acid); 16:1n7 (palmitoleic acid); 18:0 (stearic acid); 18:1n9 (oleic acid); 20:0 (arachidic acid); 22:0 (behenic acid); 24:0 (lignoceric acid); 24:1n9 (nervonic acid).

The content of polyunsaturated fatty acids (PUFA): 18:2n6 (linoleic acid), 18:3n3 ( $\alpha$ -linolenic acid), 20:4n6 (arachidonic acid), 20:5n3 (eicosapentaenoic acid) and 20:6n3 (docosahexaenoic acid) in the FFA fraction in the white gastrocnemius muscle was published in our previous publication: Bielawiec et al. (doi: 10.3390/nu13051603).

**Supplementary Table S2.** Individual fatty acids content in the DAG fraction (nmol/g of wet tissue) in the white gastrocnemius muscle in the control (standard diet) and high-fat diet (HFD) groups after two-week cannabidiol (CBD) treatment.

| Fatty acid    | Control        | CBD                         | HFD                         | HFD + CBD                   |
|---------------|----------------|-----------------------------|-----------------------------|-----------------------------|
| <b>14:0</b>   | 27.45 ± 7.59   | 33.69 ± 9.78                | 23.27 ± 5.98                | 28.56 ± 4.33                |
| <b>16:0</b>   | 217.01 ± 34.90 | 169.69 ± 34.26 <sup>a</sup> | 156.80 ± 23.56 <sup>a</sup> | 173.11 ± 23.86 <sup>a</sup> |
| <b>16:1n7</b> | 8.73 ± 0.82    | 6.41 ± 1.24 <sup>a</sup>    | 6.26 ± 1.58 <sup>a</sup>    | 5.57 <sup>a</sup> ± 1.07    |
| <b>18:0</b>   | 81.82 ± 12.93  | 68.40 ± 11.85 <sup>a</sup>  | 56.81 ± 6.84 <sup>a</sup>   | 90.97 ± 14.38 <sup>b</sup>  |
| <b>18:1n9</b> | 56.23 ± 10.02  | 31.46 ± 4.80 <sup>a</sup>   | 53.88 ± 9.58                | 53.34 ± 9.15                |
| <b>20:0</b>   | 2.29 ± 0.24    | 1.85 ± 0.46 <sup>a</sup>    | 2.31 ± 0.63                 | 1.78 ± 0.26 <sup>a,b</sup>  |
| <b>22:0</b>   | 1.59 ± 0.20    | 1.50 ± 0.30                 | 1.57 ± 0.51                 | 1.53 ± 0.24                 |
| <b>24:0</b>   | 3.18 ± 0.32    | 2.92 ± 0.48                 | 3.09 ± 0.42                 | 2.51 ± 0.39 <sup>a,b</sup>  |
| <b>24:1n9</b> | 1.11 ± 0.24    | 0.85 ± 0.16 <sup>a</sup>    | 1.19 ± 0.35                 | 0.89 ± 0.13 <sup>a,b</sup>  |

The data are expressed as mean values ± SD, n = 10 in each group. <sup>a</sup>p < 0.05 indicates a significant difference: the control group vs. the examined group in the white gastrocnemius muscle; <sup>b</sup>p < 0.05 indicates a significant difference: HFD vs. HFD + CBD in the white gastrocnemius muscle. 14:0 (myristic acid); 16:0 (palmitic acid); 16:1n7 (palmitoleic acid);

18:0 (stearic acid); 18:1n9 (oleic acid); 20:0 (arachidic acid); 22:0 (behenic acid); 24:0 (lignoceric acid); 24:1n9 (nervonic acid).

The content of polyunsaturated fatty acids (PUFA): 18:2n6 (linoleic acid), 18:3n3 ( $\alpha$ -linolenic acid), 20:4n6 (arachidonic acid), 20:5n3 (eicosapentaenoic acid) and 20:6n3 (docosahexaenoic acid) in the FFA fraction in the white gastrocnemius muscle was published in our previous publication: Bielawiec et al. (doi: 10.3390/nu13051603).

**Supplementary Table S3.** Individual fatty acids content in the TAG fraction (nmol/g of wet tissue) in the white gastrocnemius muscle in the control (standard diet) and high-fat diet (HFD) groups after two-week cannabidiol (CBD) treatment.

| Fatty acid    | Control         | CBD                          | HFD                           | HFD + CBD                       |
|---------------|-----------------|------------------------------|-------------------------------|---------------------------------|
| <b>14:0</b>   | 70.18 ± 12.62   | 44.34 ± 9.81 <sup>a</sup>    | 120.34 ± 21.34 <sup>a</sup>   | 90.55 ± 14.11 <sup>a,b</sup>    |
| <b>16:0</b>   | 910.56 ± 168.78 | 605.37 ± 112.01 <sup>a</sup> | 1726.44 ± 588.80 <sup>a</sup> | 1596.05 ± 214.60 <sup>a</sup>   |
| <b>16:1n7</b> | 130.19 ± 19.27  | 106.15 ± 38.12               | 148.07 ± 48.62                | 130.50 ± 43.64                  |
| <b>18:0</b>   | 166.28 ± 31.11  | 114.17 ± 18.22 <sup>a</sup>  | 489.56 ± 158.25 <sup>a</sup>  | 419.55 ± 71.98 <sup>a,b</sup>   |
| <b>18:1n9</b> | 523.38 ± 130.35 | 337.36 ± 83.95 <sup>a</sup>  | 2418.58 ± 653.68 <sup>a</sup> | 1634.38 ± 300.92 <sup>a,b</sup> |
| <b>20:0</b>   | 5.24 ± 1.46     | 4.81 ± 0.55                  | 6.15 ± 1.34                   | 5.71 ± 1.08                     |
| <b>22:0</b>   | 5.37 ± 1.49     | 4.15 ± 1.12 <sup>a</sup>     | 5.61 ± 1.59                   | 6.50 ± 1.46                     |
| <b>24:0</b>   | 5.50 ± 1.44     | 5.64 ± 0.70                  | 4.21 ± 1.03 <sup>a</sup>      | 2.18 ± 0.90 <sup>a,b</sup>      |
| <b>24:1n9</b> | 3.83 ± 1.22     | 2.64 ± 0.80 <sup>a</sup>     | 2.91 ± 1.14                   | 3.15 ± 1.22                     |

The data are expressed as mean values ± SD, n = 10 in each group. <sup>a</sup>p < 0.05 indicates a significant difference: the control group vs. the examined group in the white gastrocnemius muscle; <sup>b</sup>p < 0.05 indicates a significant difference: HFD vs. HFD + CBD in the white gastrocnemius muscle. 14:0 (myristic acid); 16:0 (palmitic acid); 16:1n7 (palmitoleic acid); 18:0 (stearic acid); 18:1n9 (oleic acid); 20:0 (arachidic acid); 22:0 (behenic acid); 24:0 (lignoceric acid); 24:1n9 (nervonic acid).

The content of polyunsaturated fatty acids (PUFA): 18:2n6 (linoleic acid), 18:3n3 ( $\alpha$ -linolenic acid), 20:4n6 (arachidonic acid), 20:5n3 (eicosapentaenoic acid) and 20:6n3 (docosahexaenoic acid) in the FFA fraction in the white gastrocnemius muscle was published in our previous publication: Bielawiec et al. (doi: 10.3390/nu13051603).

**Supplementary Table S4.** Individual fatty acids content in the PL fraction (nmol/g of wet tissue) in the white gastrocnemius muscle in the control (standard diet) and high-fat diet (HFD) groups after two-week cannabidiol (CBD) treatment.

| Fatty acid    | Control          | CBD                            | HFD                           | HFD + CBD                     |
|---------------|------------------|--------------------------------|-------------------------------|-------------------------------|
| <b>14:0</b>   | 82.48 ± 9.72     | 55.26 ± 7.50 <sup>a</sup>      | 67.81 ± 7.20 <sup>a</sup>     | 57.11 ± 5.99 <sup>a,b</sup>   |
| <b>16:0</b>   | 6319.50 ± 336.78 | 5608.23 ± 1109.50 <sup>a</sup> | 5819.05 ± 236.40 <sup>a</sup> | 5908.39 ± 1395.59             |
| <b>16:1n7</b> | 151.99 ± 21.81   | 127.52 ± 12.86 <sup>a</sup>    | 87.13 ± 6.31 <sup>a</sup>     | 96.00 ± 11.85 <sup>a,b</sup>  |
| <b>18:0</b>   | 3216.55 ± 157.16 | 3196.03 ± 166.30               | 3292.10 ± 142.70 <sup>a</sup> | 3602.94 ± 491.54              |
| <b>18:1n9</b> | 739.71 ± 48.41   | 580.55 ± 31.32 <sup>a</sup>    | 738.69 ± 26.00                | 853.98 ± 95.24 <sup>a,b</sup> |
| <b>20:0</b>   | 12.80 ± 1.70     | 12.43 ± 1.37                   | 11.85 ± 2.18                  | 11.41 ± 2.03                  |
| <b>22:0</b>   | 15.30 ± 4.48     | 15.07 ± 4.42                   | 17.10 ± 3.47                  | 15.18 ± 3.56                  |
| <b>24:0</b>   | 14.11 ± 2.75     | 12.94 ± 1.98                   | 13.79 ± 2.72                  | 12.87 ± 3.53                  |
| <b>24:1n9</b> | 12.75 ± 1.97     | 13.84 ± 2.48                   | 11.87 ± 2.25                  | 9.93 ± 2.09 <sup>a,b</sup>    |

The data are expressed as mean values  $\pm$  SD, n = 10 in each group. <sup>a</sup>p < 0.05 indicates a significant difference: the control group vs. the examined group in the white gastrocnemius muscle; <sup>b</sup>p < 0.05 indicates a significant difference: HFD vs. HFD + CBD in the white gastrocnemius muscle. 14:0 (myristic acid); 16:0 (palmitic acid); 16:1n7 (palmitoleic acid); 18:0 (stearic acid); 18:1n9 (oleic acid); 20:0 (arachidic acid); 22:0 (behenic acid); 24:0 (lignoceric acid); 24:1n9 (nervonic acid).

The content of polyunsaturated fatty acids (PUFA): 18:2n6 (linoleic acid), 18:3n3 ( $\alpha$ -linolenic acid), 20:4n6 (arachidonic acid), 20:5n3 (eicosapentaenoic acid) and 20:6n3 (docosahexaenoic acid) in the FFA fraction in the white gastrocnemius muscle was published in our previous publication: Bielawiec et al. (doi: 10.3390/nu13051603).

## Red skeletal muscle

**Supplementary Table S5.** Individual fatty acids content in the FFA fraction (nmol/g of wet tissue) in the red gastrocnemius muscle in the control (standard diet) and high-fat diet (HFD) groups after two-week cannabidiol (CBD) treatment.

| Fatty acid    | Control            | CBD                             | HFD                             | HFD + CBD                         |
|---------------|--------------------|---------------------------------|---------------------------------|-----------------------------------|
| <b>14:0</b>   | 29.62 $\pm$ 4.29   | 31.88 $\pm$ 4.35                | 42.44 $\pm$ 4.52 <sup>a</sup>   | 32.65 $\pm$ 5.52 <sup>b</sup>     |
| <b>16:0</b>   | 268.41 $\pm$ 48.79 | 315.23 $\pm$ 14.52 <sup>a</sup> | 413.63 $\pm$ 39.69 <sup>a</sup> | 380.31 $\pm$ 31.76 <sup>a,b</sup> |
| <b>16:1n7</b> | 26.71 $\pm$ 5.23   | 30.80 $\pm$ 6.43                | 35.90 $\pm$ 5.49 <sup>a</sup>   | 28.60 $\pm$ 2.55 <sup>b</sup>     |
| <b>18:0</b>   | 97.99 $\pm$ 10.60  | 126.61 $\pm$ 12.56 <sup>a</sup> | 146.67 $\pm$ 10.99 <sup>a</sup> | 167.47 $\pm$ 19.87 <sup>a,b</sup> |
| <b>18:1n9</b> | 175.30 $\pm$ 20.16 | 225.88 $\pm$ 26.57 <sup>a</sup> | 713.96 $\pm$ 61.80 <sup>a</sup> | 667.55 $\pm$ 39.57 <sup>a</sup>   |
| <b>20:0</b>   | 1.94 $\pm$ 0.14    | 2.77 $\pm$ 0.42 <sup>a</sup>    | 2.23 $\pm$ 0.33 <sup>a</sup>    | 2.76 $\pm$ 0.35 <sup>a,b</sup>    |
| <b>22:0</b>   | 1.32 $\pm$ 0.18    | 2.06 $\pm$ 0.36 <sup>a</sup>    | 1.66 $\pm$ 0.35 <sup>a</sup>    | 1.61 $\pm$ 0.32 <sup>a</sup>      |
| <b>24:0</b>   | 4.01 $\pm$ 0.83    | 6.24 $\pm$ 0.75 <sup>a</sup>    | 6.19 $\pm$ 0.94 <sup>a</sup>    | 5.27 $\pm$ 0.97 <sup>a</sup>      |
| <b>24:1n9</b> | 1.04 $\pm$ 0.23    | 1.35 $\pm$ 0.24 <sup>a</sup>    | 1.28 $\pm$ 0.32                 | 1.05 $\pm$ 0.27                   |

The data are expressed as mean values  $\pm$  SD, n = 10 in each group. <sup>a</sup>p < 0.05 indicates a significant difference: the control group vs. the examined group in the red gastrocnemius muscle; <sup>b</sup>p < 0.05 indicates a significant difference: HFD vs. HFD + CBD in the red gastrocnemius muscle. 14:0 (myristic acid); 16:0 (palmitic acid); 16:1n7 (palmitoleic acid); 18:0 (stearic acid); 18:1n9 (oleic acid); 20:0 (arachidic acid); 22:0 (behenic acid); 24:0 (lignoceric acid); 24:1n9 (nervonic acid).

The content of polyunsaturated fatty acids (PUFA): 18:2n6 (linoleic acid), 18:3n3 ( $\alpha$ -linolenic acid), 20:4n6 (arachidonic acid), 20:5n3 (eicosapentaenoic acid) and 20:6n3 (docosahexaenoic acid) in the FFA fraction in the red gastrocnemius muscle was published in our previous publication: Bielawiec et al. (doi: 10.3390/nu13051603).

**Supplementary Table S6.** Individual fatty acids content in the DAG fraction (nmol/g of wet tissue) in the red gastrocnemius muscle in the control (standard diet) and high-fat diet (HFD) groups after two-week cannabidiol (CBD) treatment.

| Fatty acid    | Control        | CBD                       | HFD                         | HFD + CBD                     |
|---------------|----------------|---------------------------|-----------------------------|-------------------------------|
| <b>14:0</b>   | 29.93 ± 12.64  | 30.67 ± 7.10              | 42.33 ± 16.52               | 31.87 ± 8.89                  |
| <b>16:0</b>   | 214.52 ± 48.79 | 213.12 ± 14.52            | 273.88 ± 39.69 <sup>a</sup> | 233.31 ± 10.56 <sup>b</sup>   |
| <b>16:1n7</b> | 7.29 ± 1.56    | 7.94 ± 1.23               | 8.72 ± 0.79 <sup>a</sup>    | 8.46 ± 0.67                   |
| <b>18:0</b>   | 75.28 ± 8.65   | 95.68 ± 8.14 <sup>a</sup> | 115.72 ± 10.72 <sup>a</sup> | 138.97 ± 10.58 <sup>a,b</sup> |
| <b>18:1n9</b> | 55.14 ± 16.18  | 49.84 ± 5.08              | 215.66 ± 31.77 <sup>a</sup> | 183.39 ± <sup>a,b</sup>       |
| <b>20:0</b>   | 1.83 ± 0.42    | 2.11 ± 0.16               | 2.61 ± 0.62 <sup>a</sup>    | 2.60 ± 0.56 <sup>a</sup>      |
| <b>22:0</b>   | 1.31 ± 0.24    | 1.41 ± 0.23               | 1.59 ± 0.43                 | 1.77 ± 0.51                   |
| <b>24:0</b>   | 2.02 ± 0.16    | 2.39 ± 0.34 <sup>a</sup>  | 2.32 ± 0.76                 | 2.91 ± 0.84 <sup>a</sup>      |
| <b>24:1n9</b> | 0.60 ± 0.19    | 0.95 ± 0.25 <sup>a</sup>  | 0.95 ± 0.33 <sup>a</sup>    | 1.01 ± 0.23 <sup>b</sup>      |

The data are expressed as mean values ± SD, n = 10 in each group. <sup>a</sup>p < 0.05 indicates a significant difference: the control group vs. the examined group in the red gastrocnemius muscle; <sup>b</sup>p < 0.05 indicates a significant difference: HFD vs. HFD + CBD in the red gastrocnemius muscle. 14:0 (myristic acid); 16:0 (palmitic acid); 16:1n7 (palmitoleic acid); 18:0 (stearic acid); 18:1n9 (oleic acid); 20:0 (arachidic acid); 22:0 (behenic acid); 24:0 (lignoceric acid); 24:1n9 (nervonic acid).

The content of polyunsaturated fatty acids (PUFA): 18:2n6 (linoleic acid), 18:3n3 ( $\alpha$ -linolenic acid), 20:4n6 (arachidonic acid), 20:5n3 (eicosapentaenoic acid) and 20:6n3 (docosahexaenoic acid) in the FFA fraction in the red gastrocnemius muscle was published in our previous publication: Bielawiec et al. (doi: 10.3390/nu13051603).

**Supplementary Table S7.** Individual fatty acids content in the TAG fraction (nmol/g of wet tissue) in the red gastrocnemius muscle in the control (standard diet) and high-fat diet (HFD) groups after two-week cannabidiol (CBD) treatment.

| Fatty acid    | Control         | CBD                        | HFD                           | HFD + CBD                     |
|---------------|-----------------|----------------------------|-------------------------------|-------------------------------|
| <b>14:0</b>   | 64.68 ± 24.96   | 87.88 ± 19.25 <sup>a</sup> | 175.62 ± 63.99 <sup>a</sup>   | 109.04 ± 20.32 <sup>a,b</sup> |
| <b>16:0</b>   | 985.04 ± 518.52 | 1148.96 ± 170.47           | 2402.32 ± 571.72 <sup>a</sup> | 2243.00 ± 417.58 <sup>a</sup> |
| <b>16:1n7</b> | 229.87 ± 177.07 | 148.85 ± 29.75             | 144.92 ± 88.65                | 95.62 ± 41.97 <sup>a</sup>    |
| <b>18:0</b>   | 204.15 ± 98.17  | 171.40 ± 12.28             | 819.29 ± 224.85 <sup>a</sup>  | 687.64 ± 88.36 <sup>a</sup>   |
| <b>18:1n9</b> | 383.66 ± 218.08 | 563.89 ± 149.13            | 1898.44 ± 520.64 <sup>a</sup> | 1916.44 ± 496.42 <sup>a</sup> |
| <b>20:0</b>   | 4.86 ± 1.40     | 4.42 ± 1.16                | 11.16 ± 2.54 <sup>a</sup>     | 12.67 ± 2.06 <sup>a</sup>     |
| <b>22:0</b>   | 6.30 ± 1.17     | 6.17 ± 2.00                | 8.12 ± 2.04 <sup>a</sup>      | 8.73 ± 1.78 <sup>a</sup>      |
| <b>24:0</b>   | 3.21 ± 0.80     | 3.26 ± 1.32                | 3.15 ± 1.46                   | 3.15 ± 0.74                   |
| <b>24:1n9</b> | 3.76 ± 0.64     | 3.07 ± 1.08                | 3.07 ± 0.85                   | 4.31 ± 1.23 <sup>b</sup>      |

The data are expressed as mean values ± SD, n = 10 in each group. <sup>a</sup>p < 0.05 indicates a significant difference: the control group vs. the examined group in the red gastrocnemius muscle; <sup>b</sup>p < 0.05 indicates a significant difference: HFD vs. HFD + CBD in the red gastrocnemius muscle. 14:0 (myristic acid); 16:0 (palmitic acid); 16:1n7 (palmitoleic acid); 18:0 (stearic acid); 18:1n9 (oleic acid); 20:0 (arachidic acid); 22:0 (behenic acid); 24:0 (lignoceric acid); 24:1n9 (nervonic acid).

The content of polyunsaturated fatty acids (PUFA): 18:2n6 (linoleic acid), 18:3n3 ( $\alpha$ -linolenic acid), 20:4n6 (arachidonic acid), 20:5n3 (eicosapentaenoic acid) and 20:6n3 (docosahexaenoic

acid) in the FFA fraction in the red gastrocnemius muscle was published in our previous publication: Bielawiec et al. (doi: 10.3390/nu13051603).

**Supplementary Table S8.** Individual fatty acids content in the PL fraction (nmol/g of wet tissue) in the red gastrocnemius muscle in the control (standard diet) and high-fat diet (HFD) groups after two-week cannabidiol (CBD) treatment.

| Fatty acid    | Control          | CBD                           | HFD                           | HFD + CBD                       |
|---------------|------------------|-------------------------------|-------------------------------|---------------------------------|
| <b>14:0</b>   | 79.31 ± 12.92    | 73.20 ± 9.16                  | 77.62 ± 12.21                 | 79.21 ± 5.08                    |
| <b>16:0</b>   | 6170.28 ± 362.27 | 6367.10 ± 326.43              | 6177.77 ± 602.57              | 7524.57 ± 254.85 <sup>a,b</sup> |
| <b>16:1n7</b> | 155.33 ± 16.02   | 174.84 ± 23.24 <sup>a</sup>   | 106.52 ± 6.73 <sup>a</sup>    | 121.46 ± 8.13 <sup>a,b</sup>    |
| <b>18:0</b>   | 5028.22 ± 440.77 | 5556.33 ± 236.17 <sup>a</sup> | 6338.56 ± 179.13 <sup>a</sup> | 7599.20 ± 464.05 <sup>a,b</sup> |
| <b>18:1n9</b> | 919.62 ± 60.63   | 892.17 ± 74.69                | 1377.28 ± 69.71 <sup>a</sup>  | 1705.48 ± 107.44 <sup>a,b</sup> |
| <b>20:0</b>   | 14.51 ± 1.32     | 17.20 ± 1.55 <sup>a</sup>     | 15.04 ± 2.75                  | 15.39 ± 1.45                    |
| <b>22:0</b>   | 15.90 ± 2.48     | 19.10 ± 3.77 <sup>a</sup>     | 15.76 ± 1.66                  | 16.93 ± 1.94                    |
| <b>24:0</b>   | 12.94 ± 3.60     | 13.97 ± 3.09                  | 16.05 ± 4.15                  | 16.77 ± 2.79 <sup>a</sup>       |
| <b>24:1n9</b> | 20.79 ± 1.76     | 12.38 ± 1.60 <sup>a</sup>     | 17.25 ± 2.99 <sup>a</sup>     | 15.11 ± 2.35 <sup>a</sup>       |

The data are expressed as mean values ± SD, n = 10 in each group. <sup>a</sup>p < 0.05 indicates a significant difference: the control group vs. the examined group in the red gastrocnemius muscle; <sup>b</sup>p < 0.05 indicates a significant difference: HFD vs. HFD + CBD in the red gastrocnemius muscle. 14:0 (myristic acid); 16:0 (palmitic acid); 16:1n7 (palmitoleic acid); 18:0 (stearic acid); 18:1n9 (oleic acid); 20:0 (arachidic acid); 22:0 (behenic acid); 24:0 (lignoceric acid); 24:1n9 (nervonic acid).

The content of polyunsaturated fatty acids (PUFA): 18:2n6 (linoleic acid), 18:3n3 ( $\alpha$ -linolenic acid), 20:4n6 (arachidonic acid), 20:5n3 (eicosapentaenoic acid) and 20:6n3 (docosahexaenoic acid) in the FFA fraction in the red gastrocnemius muscle was published in our previous publication: Bielawiec et al. (doi: 10.3390/nu13051603).
